# Supplementary material for: Evaluating the suitability of granular anammox biomass for nitrogen removal from vegetable tannery wastewater
Source: Springer Nature journal article supplement (doi:10.1007/s10532-023-10017-6), 2023-02-17
Supplement: MOESM1 [file 10532_2023_10017_MOESM1_ESM.pdf]

# Evaluating the suitability of granular anammox biomass for nitrogen removal from vegetable tannery wastewater

## Supplementary Material

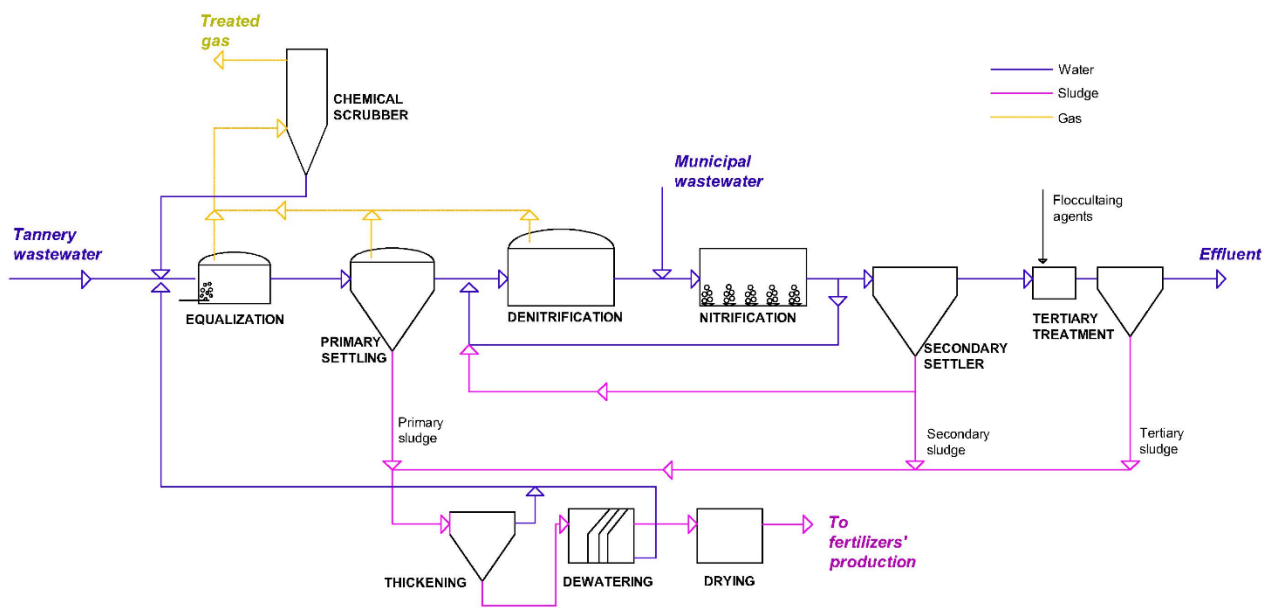

Figure S.1 Current configuration in the tannery wastewater treatment plant managed by Consorzio Cuoidepur S.p.A. (San Miniato, PISA, IT).

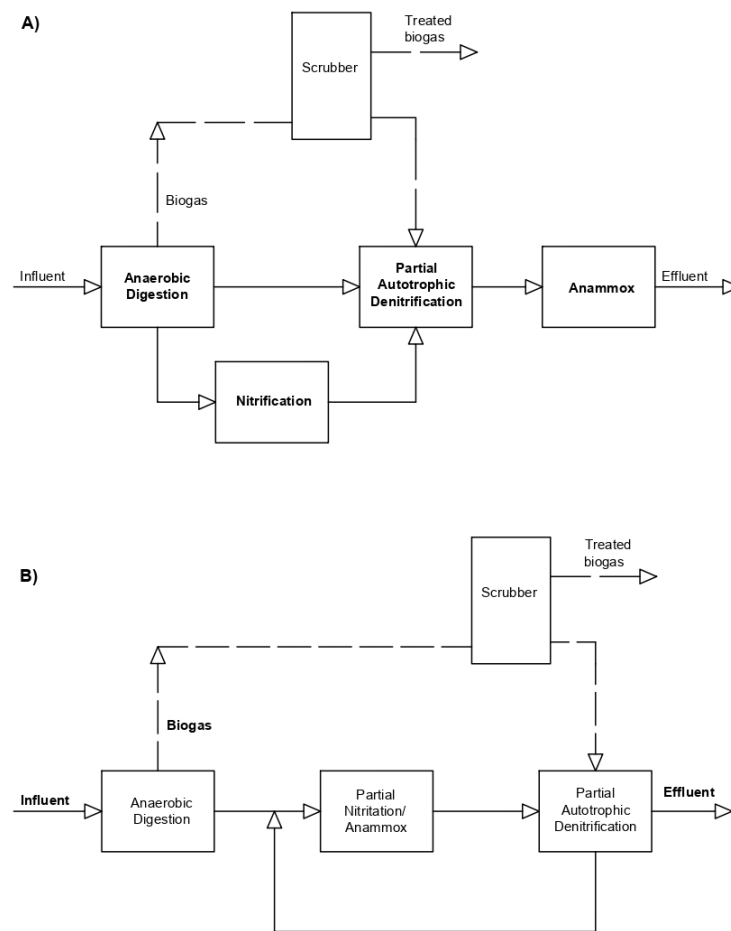

**Figure S.2 Possible configurations for innovative treatment trains of tannery wastewater, integrating Carbon, Sulphur and Nitrogen cycles.**
